# Supplementary material for: Agronomic and Physiological Traits Response of Three Tropical Sorghum (Sorghum bicolor L.) Cultivars to Drought and Salinity
Source: MDPI journal article supplement (doi:10.3390/agronomy13112788), 2023-11-09
Supplement: s1 [file s1]

## Supplementary Materials

**Table S1. Characteristics of all sorghum cultivars assessed for drought and salinity.**

| Characteristic            | WATASOLOT                | KUALI*                   | SUPER-1                   | SUPER-2                     | SAMURAI-2*                   | NUMBU*          |
|---------------------------|--------------------------|--------------------------|---------------------------|-----------------------------|------------------------------|-----------------|
|                           | 1                        | 2                        | 3                         | 4                           | 5                            | 6               |
| Released                  | No                       | No                       | 18.12.2013                | 18.12.2013                  | 7.2.2014                     | 22.10.2001      |
| Origin                    | NTT (East Nusa Tenggara) | NTT (East Nusa Tenggara) | improved Watar Hamu Putih | Improved ICRISAT line 15021 | Gamma (300 Gy) of line Zh-30 | India           |
| 50% Flowering age (days)  | n/a                      | n/a                      | 56                        | 60                          | 63                           | 69              |
| Harvest (days)            | n/a                      | n/a                      | 105-110                   | 115-120                     | 113                          | 100-105         |
| Plant height (cm)         | n/a                      | n/a                      | 204.8                     | 229.7                       | 198.7                        | 185             |
| Tiller                    | n/a                      | n/a                      | no                        | yes                         | n/a                          | no              |
| Panicle                   | n/a                      | n/a                      | compact, ellips           | scattered                   | semi compact, ellips         | compact, ellips |
| Panicle length (cm)       | n/a                      | n/a                      | 26.7                      | 26.3                        | 33.9                         | 22-23           |
| Seed shape                | n/a                      | n/a                      | n/a                       | n/a                         | n/a                          | oval            |
| Seed color                | n/a                      | n/a                      | white                     | reddish cream               | white lime                   | light brown     |
| Seed size (mm)            | n/a                      | n/a                      | 4.3; 4.0; 2.6             | 4.6; 3.6; 2.9               | n/a                          | 4.2; 4.8; 4.4   |
| Weight of 1000 seeds      | n/a                      | n/a                      | 28 g                      | 30.1 g                      | 27.4 g                       | 36-37 g         |
| Average yield (ton/ha)    | 2-5                      | 2-5                      | 2.6                       | 3.0                         | 6.4                          | 3.11            |
| Potential yield (ton/ha)  | n/a                      | n/a                      | 5.7                       | 6.3                         | 8.5                          | 4.0-5.0         |
| Protein (%)               | n/a                      | n/a                      | 12.9                      | 9.2                         | 12.40                        | 9.12            |
| Fat (%)                   | n/a                      | n/a                      | 2.2                       | 3.1                         | 2.70                         | 3.94            |
| Carbohydrate (%)          | n/a                      | n/a                      | 71.3                      | 75.6                        | 56.40                        | 84.58           |
| Brix (%)                  | n/a                      | n/a                      | 13.5                      | 12.7                        | 7.80                         | n/a             |
| Tannin (%)                | n/a                      | n/a                      | 0.11                      | 0.3                         | 0.01                         | n/a             |
| Ethanol production (L/ha) | n/a                      | n/a                      | 2.8                       | 2.7                         | 6.66                         | n/a             |
| Purpose                   | food                     | food                     | ethanol                   | ethanol                     | food                         | food/energy     |
| Resistance to P&D         | n/a                      | n/a                      | yes                       | yes                         | yes                          | yes             |
| Drought                   | yes                      | yes                      | yes                       | yes                         | yes                          | n/a             |
| Salinity                  | yes                      | yes                      | n/a                       | n/a                         | n/a                          | n/a             |

Source: Cereal Crops Research Institute of Indonesia

\* cultivars used in this experiment
